# Supplementary material for: Comparison of normal hindlimb lymphatic systems in rats with detours present after lymphatic flow blockage
Source: PubMed Central journal article supplement (PMC8668128; doi:10.1371/journal.pone.0260404), 2021-12-13
Supplement: pone.0260404.s002.pdf [file pone.0260404.s002.pdf]

## Circumference (cm)

|         |   |         | Rat1 | Rat2 | Rat3 | Rat4 | Rat5 | Rat6 | Rat7 | Rat8 |
|---------|---|---------|------|------|------|------|------|------|------|------|
| Before  | R | 1       | 7.7  | 7.5  | 8.4  | 8.2  | 6.9  | 7.1  | 6.9  | 7.8  |
|         |   | 2       | 8.2  | 7.3  | 8.2  | 8.5  | 6.9  | 7.4  | 7.0  | 7.6  |
|         |   | 3       | 7.9  | 7.3  | 8    | 8.4  | 6.8  | 7.6  | 7.3  | 7.7  |
|         |   | Average | 7.9  | 7.4  | 8.3  | 8.4  | 6.9  | 7.4  | 7.1  | 7.5  |
|         | L | 1       | 7.5  | 7.0  | 8.4  | 8.1  | 6.7  | 7.5  | 7.1  | 8.1  |
|         |   | 2       | 7.5  | 7.4  | 8.4  | 8.4  | 6.9  | 7.3  | 7.2  | 7.7  |
|         |   | 3       | 7.7  | 7.3  | 8.3  | 8.2  | 6.8  | 7.6  | 7.1  | 8.0  |
|         |   | Average | 7.6  | 7.2  | 8.4  | 8.3  | 6.8  | 7.5  | 7.1  | 7.9  |
| 3 days  | R | 1       | 8.7  | 8    | 8.2  | 10.2 | 7.6  | 7.5  | 7.2  | 8.6  |
|         |   | 2       | 9    | 8.1  | 8.6  | 9.8  | 7.6  | 7.6  | 7.3  | 8.7  |
|         |   | 3       | 8.5  | 7.6  | 8.6  | 9.8  | 7.6  | 8.4  | 7.3  | 8.5  |
|         |   | Average | 8.7  | 7.9  | 8.5  | 10   | 7.6  | 8.1  | 7.3  | 8.6  |
|         | L | 1       | 7.9  | 7.6  | 8.7  | 8.6  | 7.9  | 7.9  | 6.8  | 7.7  |
|         |   | 2       | 7.9  | 7.7  | 9.4  | 8.6  | 6.4  | 8.3  | 6.9  | 7.5  |
|         |   | 3       | 8.0  | 7.0  | 8.7  | 8.8  | 7.1  | 8.4  | 6.9  | 7.7  |
|         |   | Average | 7.9  | 7.4  | 8.9  | 8.7  | 7.1  | 8.2  | 6.9  | 7.6  |
| 30 days | R | 1       | 7.1  | 7.4  | 8.2  | 9.0  | 7.3  | 7.5  | 7.2  | 7.5  |
|         |   | 2       | 7    | 8.2  | 8.9  | 9.2  | 7.2  | 7.6  | 7.2  | 7.5  |
|         |   | 3       | 7    | 8.6  | 8.6  | 8.7  | 7.3  | 8.4  | 7.1  | 7.5  |
|         |   | Average | 7.0  | 8.1  | 8.6  | 9.0  | 7.3  | 7.8  | 7.2  | 7.5  |
|         | L | 1       | 7.5  | 8    | 8.2  | 8.5  | 6.4  | 9    | 7.4  | 9    |
|         |   | 2       | 7.6  | 8.7  | 8    | 9.1  | 6.8  | 7.7  | 7.2  | 8.5  |
|         |   | 3       | 7.7  | 7.4  | 8.2  | 8.8  | 7.5  | 7.6  | 7.4  | 9.5  |
|         |   | Average | 7.6  | 8.0  | 8.1  | 8.8  | 6.9  | 8.1  | 7.3  | 9.0  |

## Volume (ml)

|         |   |         | Rat1 | Rat2 | Rat3 | Rat4 | Rat5 | Rat6 | Rat7 | Rat8 |
|---------|---|---------|------|------|------|------|------|------|------|------|
| Before  | R | 1       | 10.1 | 6.2  | 6.1  | 9.3  | 4.4  | 5.4  | 1.7  | 3.8  |
|         |   | 2       | 8.2  | 6.6  | 6.1  | 8.6  | 4.1  | 4.5  | 2.5  | 3.8  |
|         |   | 3       | 9.5  | 8.1  | 5.5  | 8.5  | 4.6  | 5.3  | 3.0  | 4.9  |
|         |   | Average | 9.2  | 7.0  | 5.9  | 8.8  | 4.4  | 5.1  | 2.4  | 4.2  |
|         | L | 1       | 8.3  | 7.4  | 5.3  | 7.7  | 4.6  | 6.1  | 1.4  | 3.8  |
|         |   | 2       | 9.1  | 7.2  | 6.8  | 7.3  | 3.5  | 4.2  | 2.3  | 4.6  |
|         |   | 3       | 11.0 | 6.9  | 6.7  | 8.0  | 3.7  | 3.9  | 2.6  | 4.2  |
|         |   | Average | 9.5  | 7.2  | 6.3  | 7.6  | 3.9  | 4.7  | 2.1  | 4.2  |
| 3 days  | R | 1       | 11.3 | 7.9  | 5.8  | 13.4 | 4.4  | 5.4  | 1.6  | 4.3  |
|         |   | 2       | 11.1 | 7.4  | 6.6  | 13.4 | 4.7  | 4.5  | 3.2  | 4.7  |
|         |   | 3       | 9.6  | 9.3  | 8.1  | 13.4 | 4.5  | 5.7  | 2.6  | 5.6  |
|         |   | Average | 10.7 | 8.2  | 6.8  | 13.4 | 4.5  | 5.2  | 2.4  | 4.8  |
|         | L | 1       | 9.4  | 7.4  | 7.3  | 12.7 | 3.7  | 3.6  | 1.4  | 3.8  |
|         |   | 2       | 7.8  | 7.6  | 5.5  | 11.9 | 4.1  | 4.0  | 2.0  | 4.3  |
|         |   | 3       | 11.3 | 7.5  | 7.2  | 12.3 | 4.0  | 4.1  | 3.0  | 4.6  |
|         |   | Average | 9.5  | 7.5  | 6.7  | 12.3 | 4.0  | 3.9  | 2.1  | 4.3  |
| 30 days | R | 1       | 10.8 | 8.1  | 6.5  | 8.4  | 4.9  | 3.8  | 3.9  | 3.7  |
|         |   | 2       | 9.3  | 9.0  | 6.1  | 7.4  | 4.8  | 4.7  | 3.5  | 4.0  |
|         |   | 3       | 9.5  | 8.5  | 6.7  | 10.6 | 3.8  | 5.1  | 2.8  | 5.0  |
|         |   | Average | 9.9  | 8.5  | 6.5  | 8.8  | 4.5  | 4.6  | 3.4  | 4.2  |
|         | L | 1       | 11.2 | 8.6  | 7.2  | 6.9  | 4.2  | 2.9  | 3.2  | 4.0  |
|         |   | 2       | 9.0  | 9.6  | 6.8  | 7.4  | 4.1  | 3.6  | 3.1  | 4.8  |
|         |   | 3       | 10.1 | 7.8  | 6.0  | 7.4  | 4.0  | 4.4  | 4.3  | 4.1  |
|         |   | Average | 10.1 | 8.7  | 6.7  | 7.3  | 4.1  | 3.6  | 3.5  | 4.3  |
